# Supplementary figures and images for: Serum Magnesium Levels in Patients with Obstructive Sleep Apnoea: A Systematic Review and Meta-Analysis
Source: Preprints.org preprint supplement (doi:10.20944/preprints202108.0551.v1), 2021-08-30

Supplementary 1. Quality assessment ratings


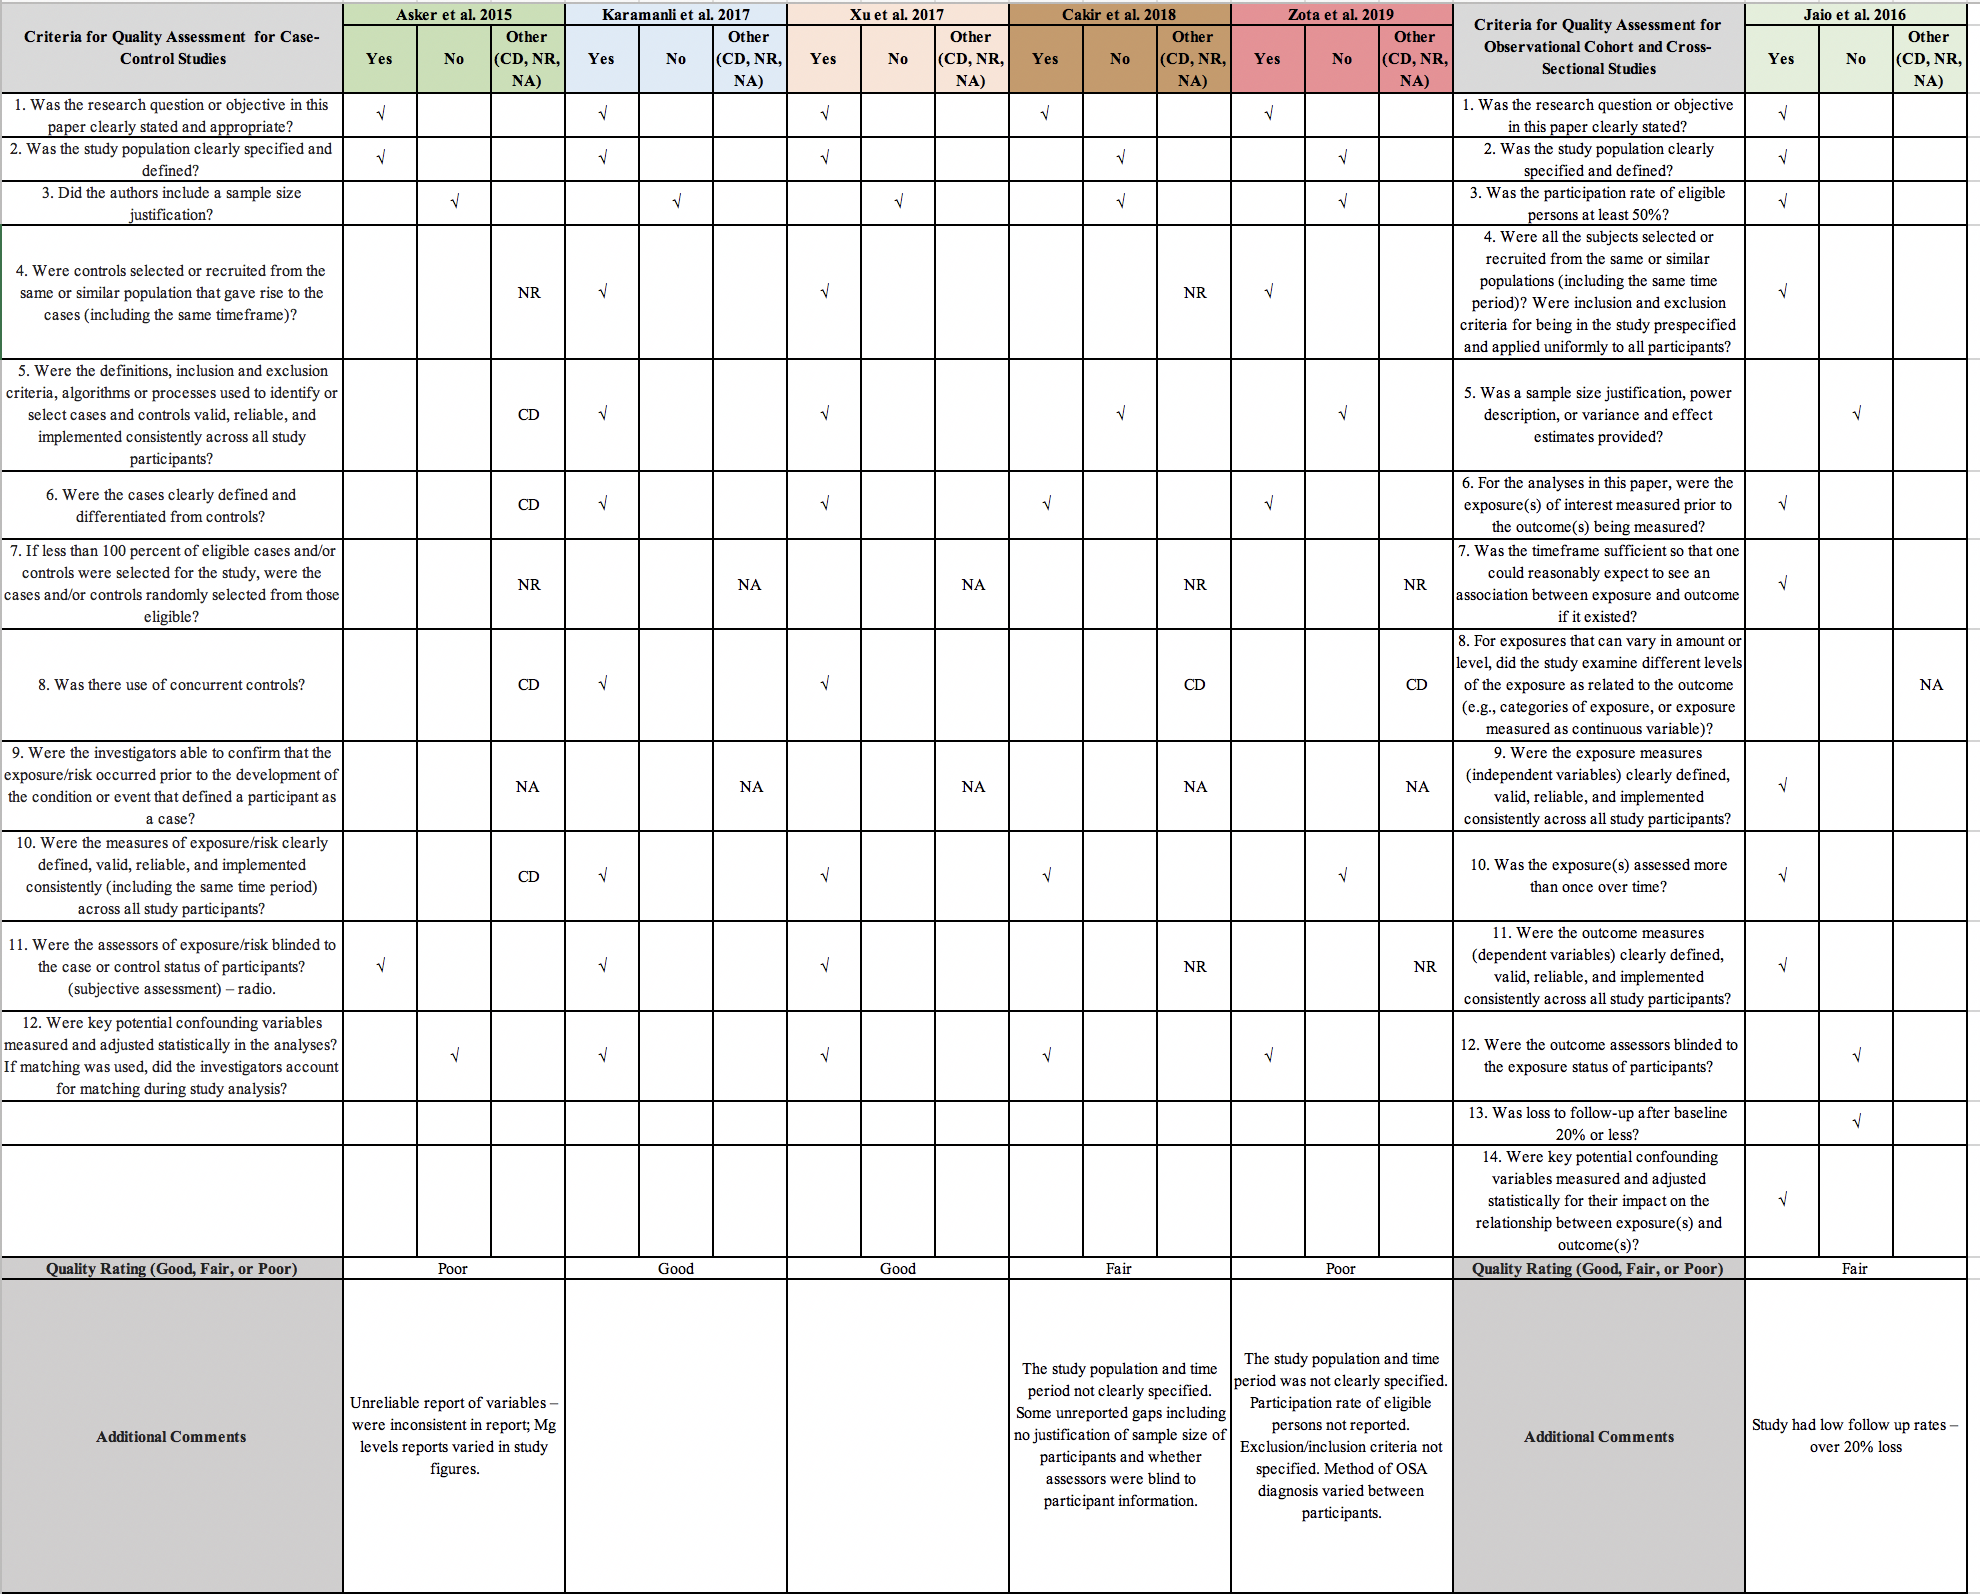

Supplement: Supplementary file 3 [file supplementary]
